# Supplementary material
Source: Springer Nature journal article supplement (https://www.springermedizin.de/resource/supplementary/12933_2011_354_MOESM2_ESM.pdf/9538228)

**A**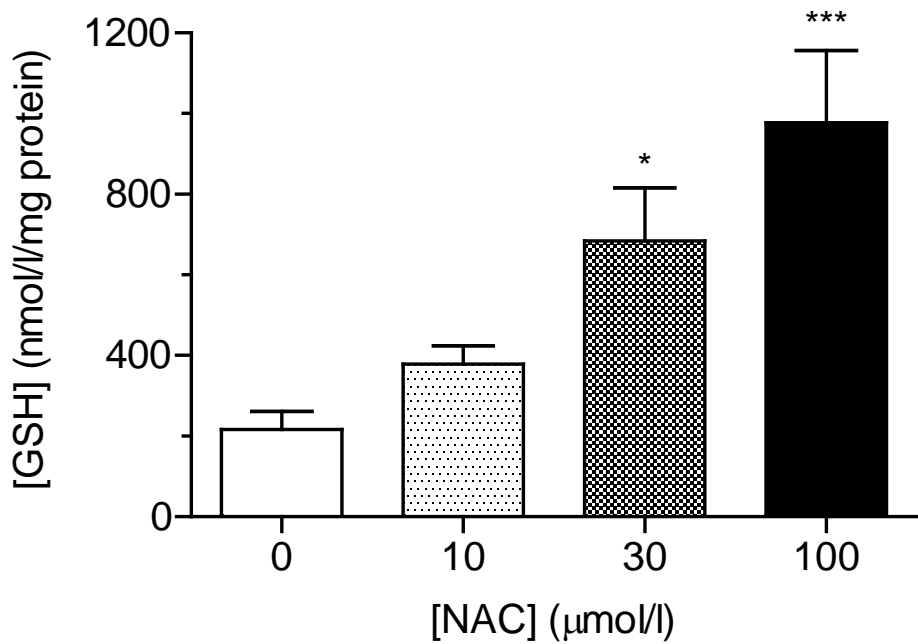**B**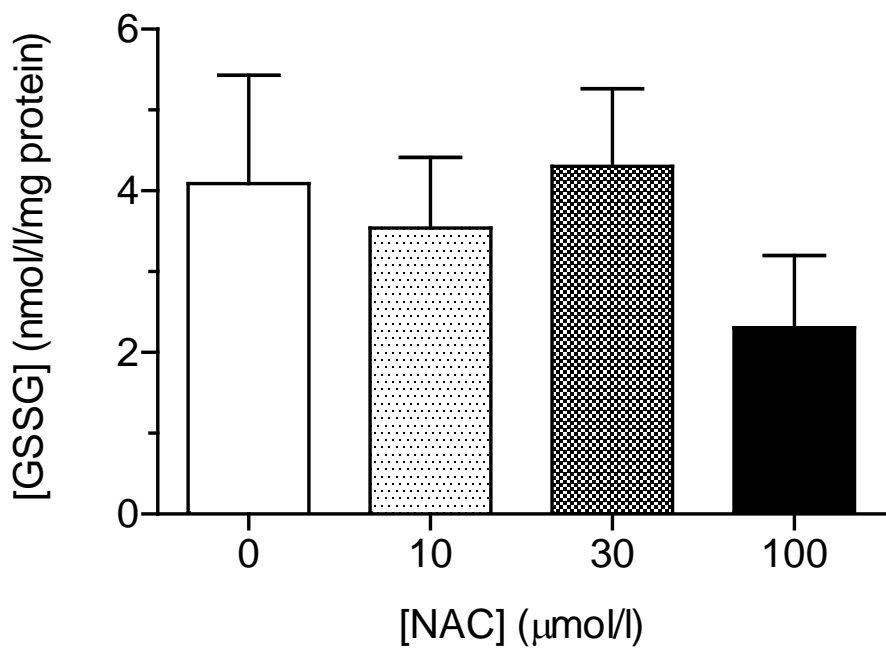

Supplement: MOESM2 [file 9538228]
